# Supplementary material for: Zinc sulfate as an adjunct to methylphenidate for the treatment of attention deficit hyperactivity disorder in children: A double blind and randomized trial [ISRCTN64132371]
Source: Springer Nature journal article supplement (doi:10.1186/1471-244x-4-9), 2004-04-08

# Teacher ADHD Rating Scale

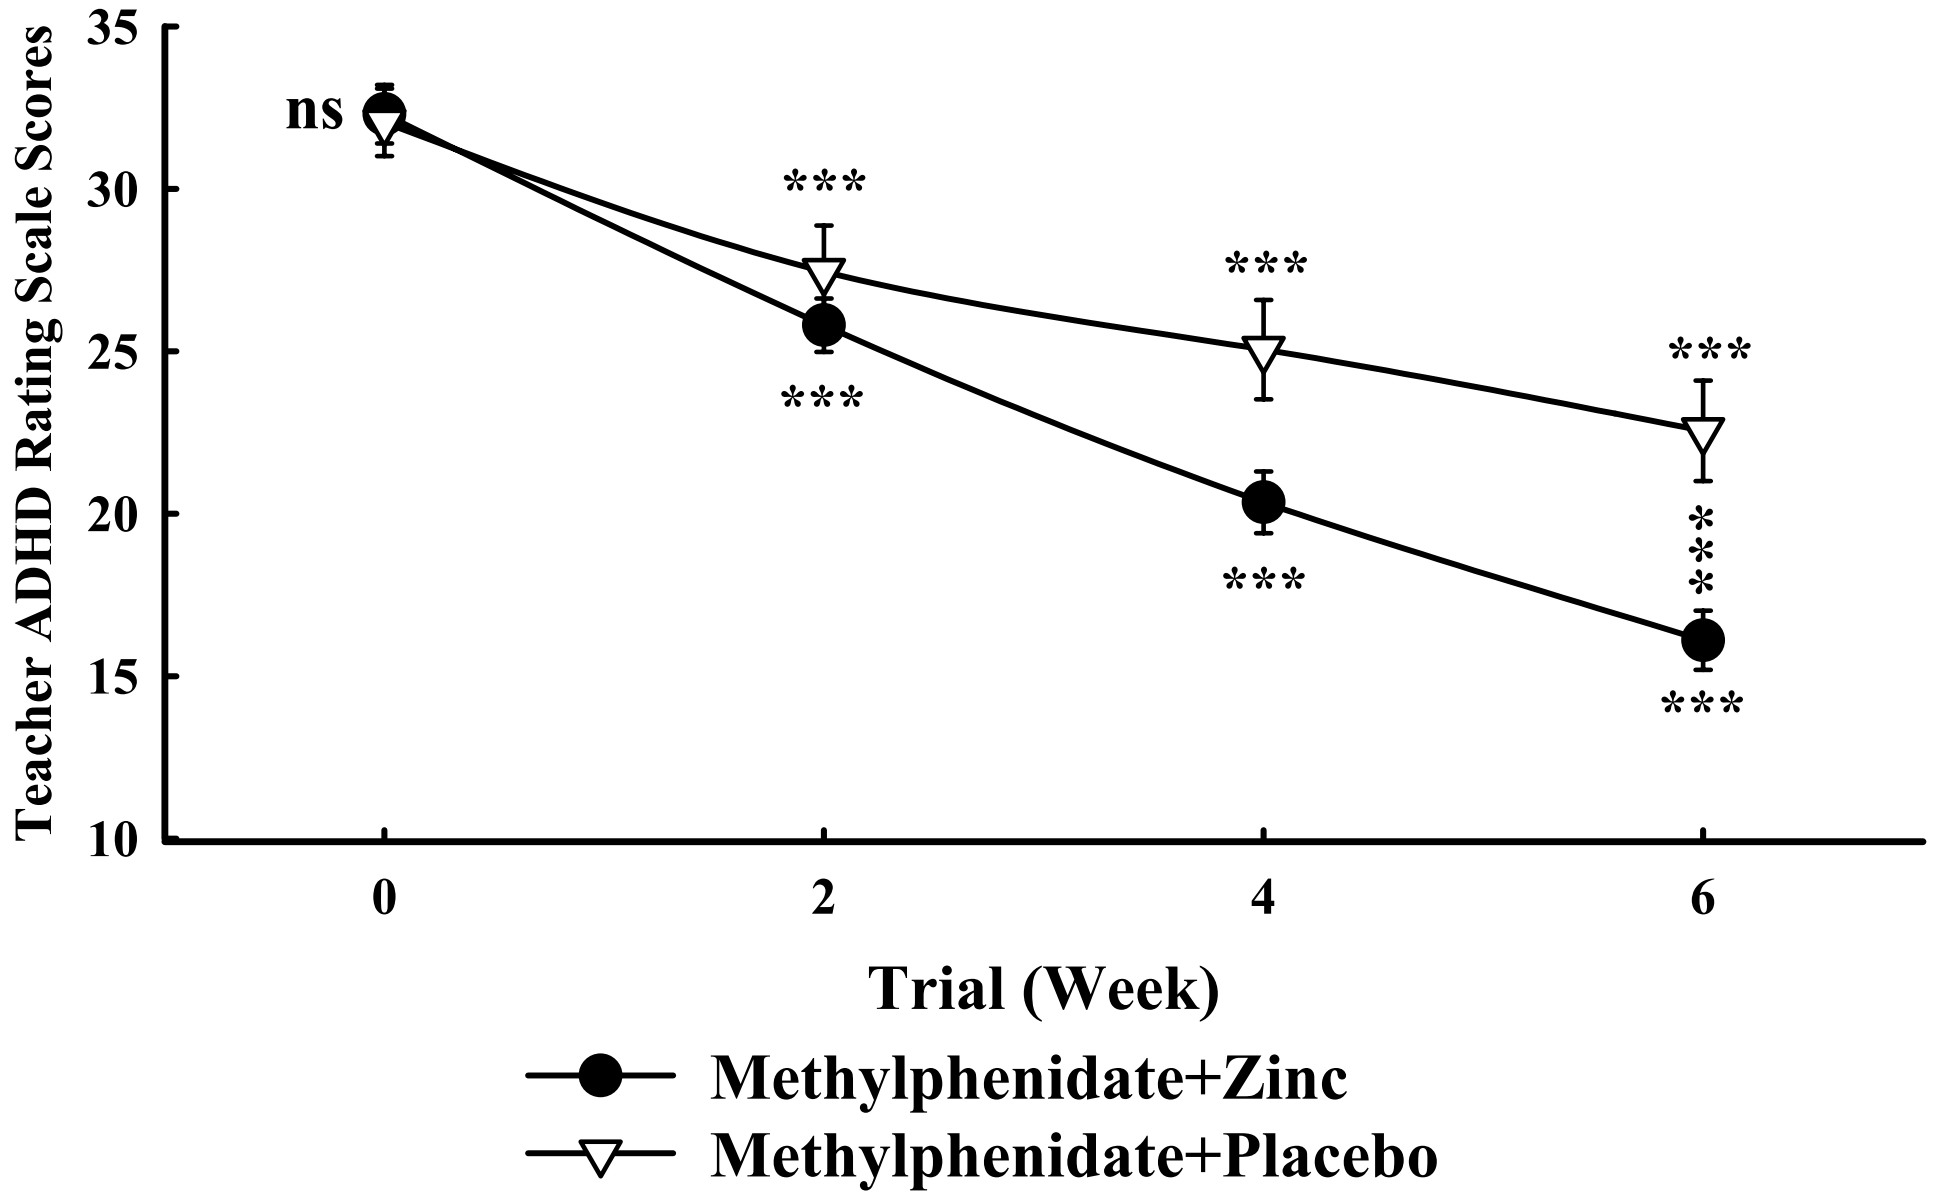

Supplement: 12888_2004_48_MOESM2_ESM.pdf [file 12888_2004_48_MOESM2_ESM.pdf]
